# Supplementary material
Source: PubMed Central journal article supplement (PMC11062412)

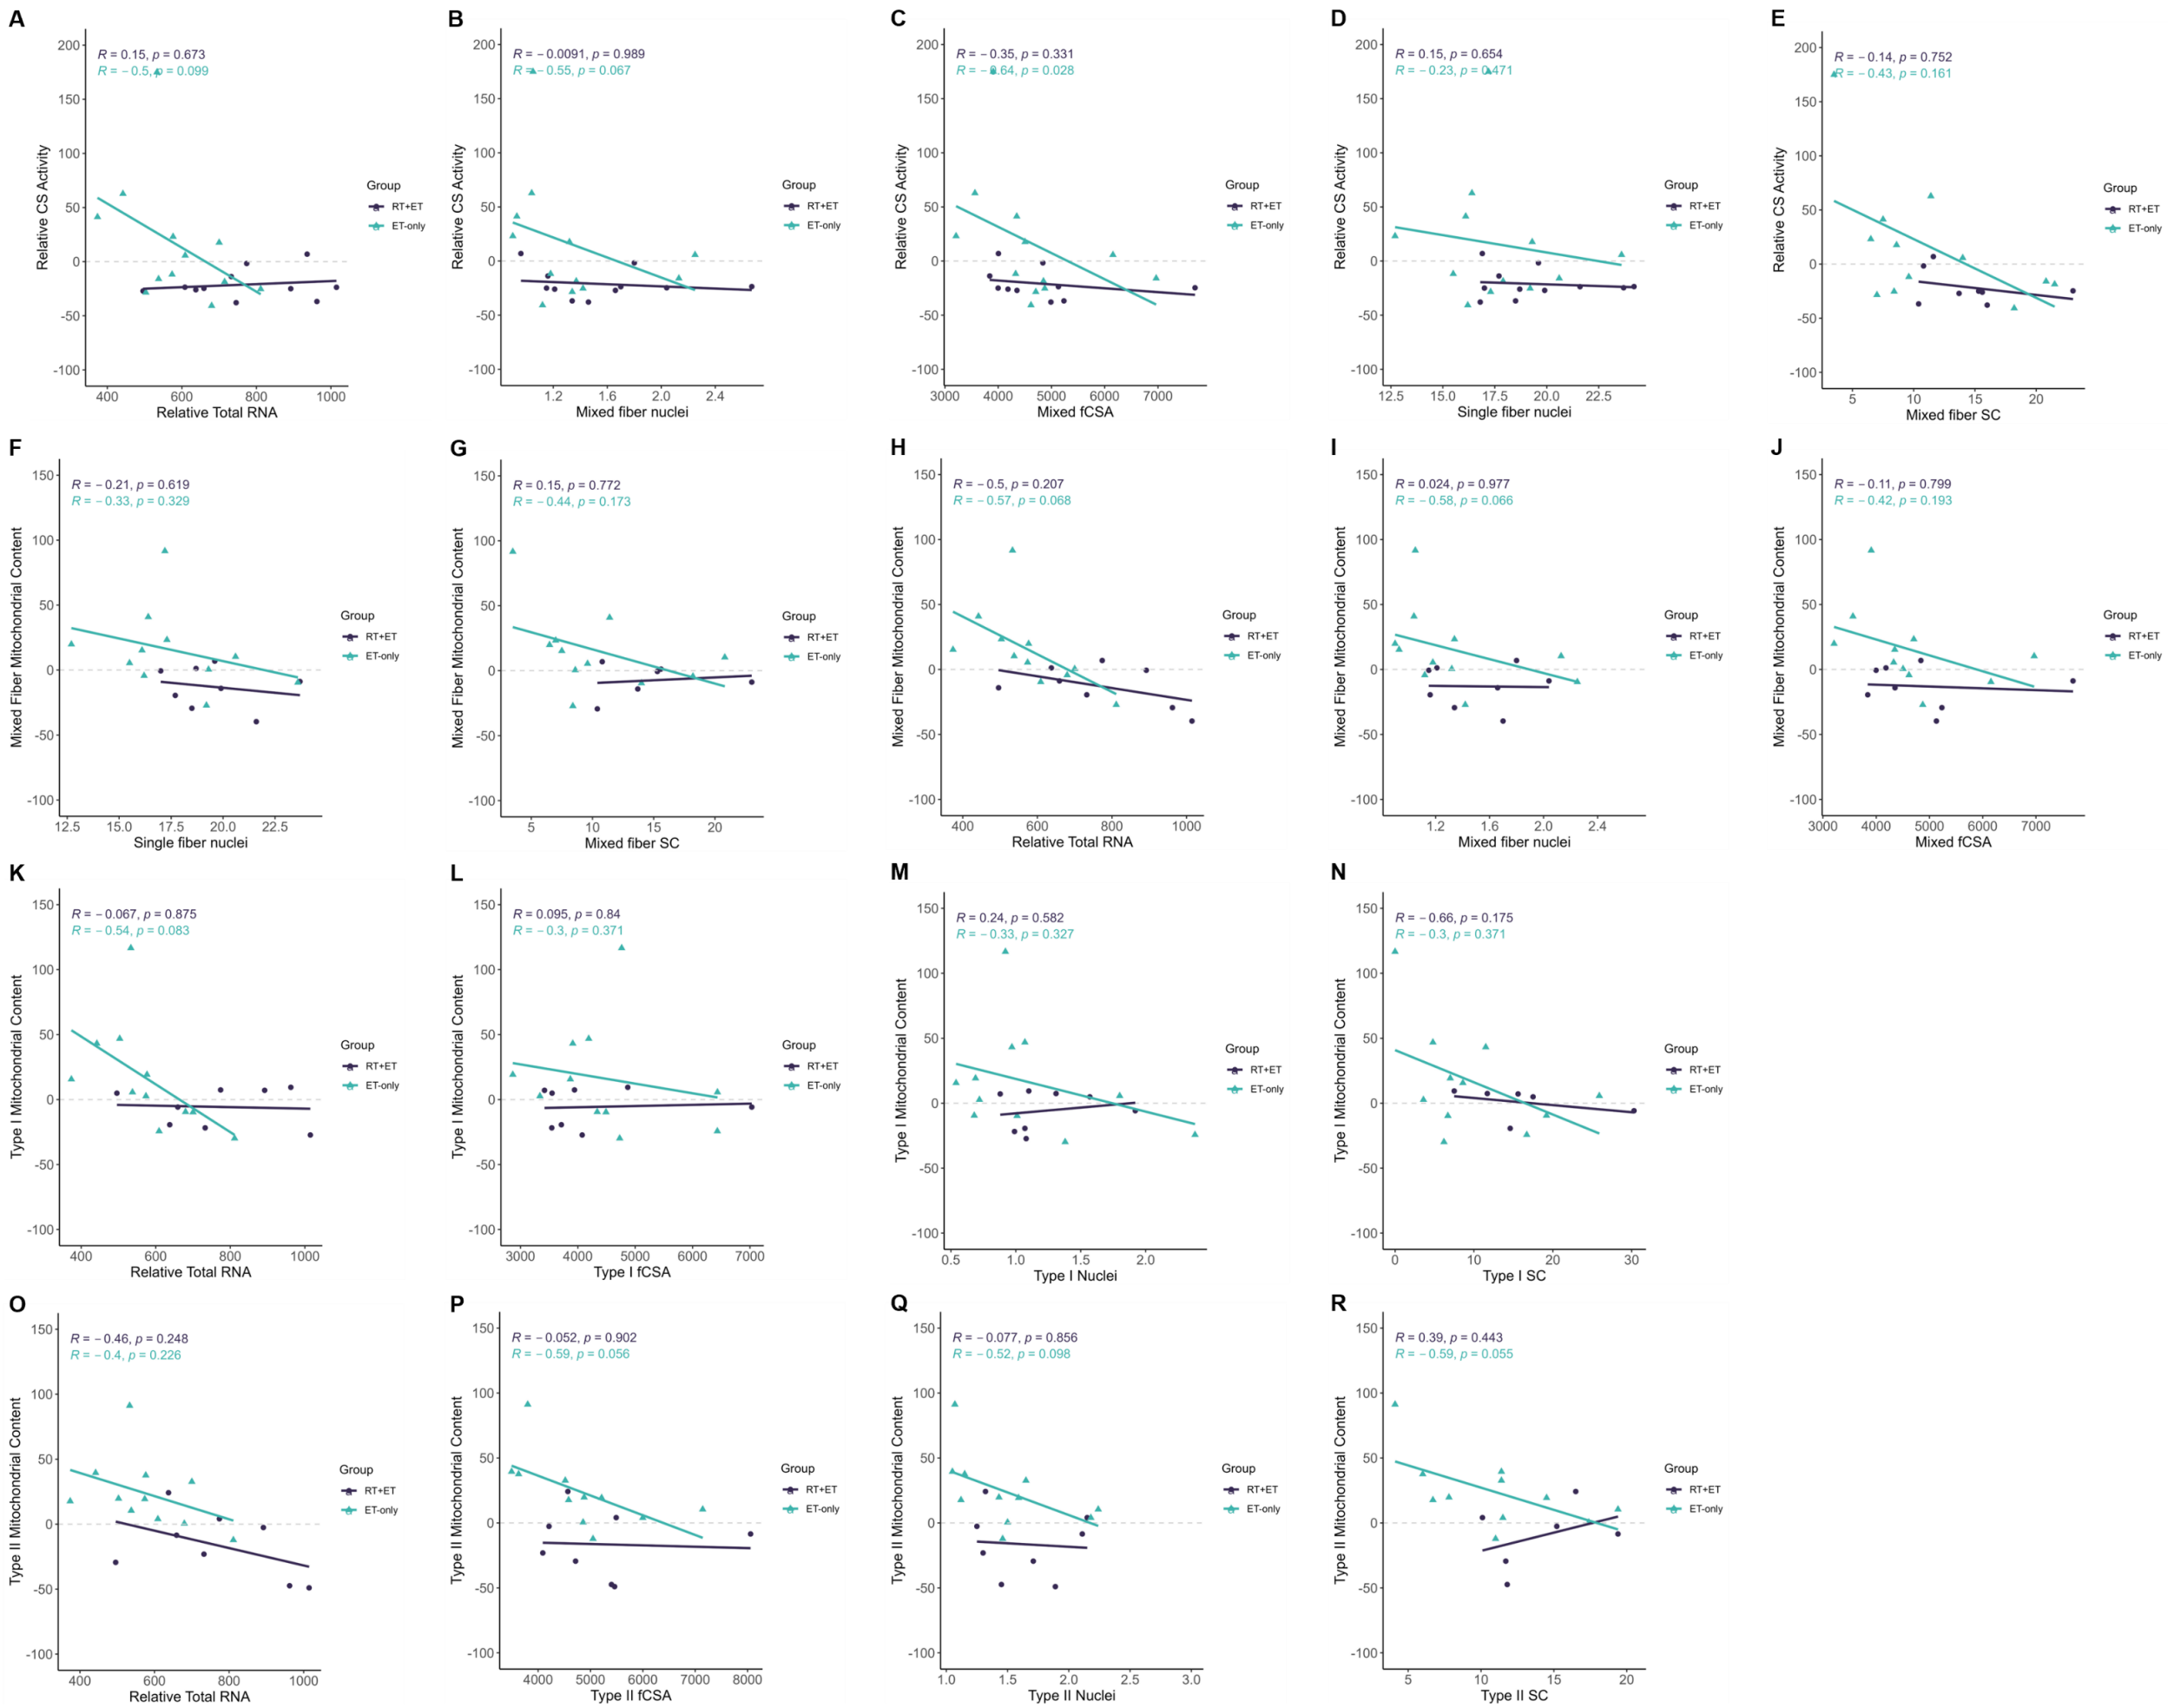

Supplement: NIHMS1917027-supplement-Fig_S1.pdf [file NIHMS1917027-supplement-Fig_S1.pdf]
